# Supplementary material for: Water-soluble Al(iii), Fe(iii) and Cu(ii) formazanates: synthesis, structure, and applications in alkane and alcohol oxidations
Source: Royal Society of Chemistry journal article supplement (doi:10.1039/d1nj06211e), 2022-01-01
Supplement: d1nj06211e1.pdf [file d1nj06211e1.pdf]

## Electronic Supplementary Information

belonging to the article

### **Water-soluble Al(III), Fe(III) and Cu(II) formazanates: synthesis, structure, applications in alkane and alcohol oxidations**

Atash V. Gurbanov,<sup>\*a,b</sup> Marta A. Andrade,<sup>\*a</sup> Luísa M. D. R. S. Martins,<sup>\*a</sup>  
Kamran T. Mahmudov<sup>a,b</sup> and Armando J. L. Pombeiro,<sup>\*a,c</sup>

<sup>a</sup> Centro de Química Estrutural, Institute of Molecular Sciences, and Departamento de Engenharia Química, Instituto Superior Técnico, Universidade de Lisboa, Av. Rovisco Pais, 1049-001 Lisboa, Portugal

<sup>b</sup> Department of Chemistry, Baku State University, Z. Xalilov Str. 23, Az 1148 Baku, Azerbaijan

<sup>c</sup> Peoples' Friendship University of Russia (RUDN University), Research Institute of Chemistry, 6 Miklukho-Maklaya St, Moscow, 117198, Russian Federation

\*Corresponding authors

*E-mail addresses:*

[organik10@hotmail.com](mailto:organik10@hotmail.com) (Atash V. Gurbanov)

[marta.andrade@tecnico.ulisboa.pt](mailto:marta.andrade@tecnico.ulisboa.pt) (Marta A. Andrade)

[luisammartins@tecnico.ulisboa.pt](mailto:luisammartins@tecnico.ulisboa.pt) (Luísa M. D. R. S. Martins)

[pombeiro@tecnico.ulisboa.pt](mailto:pombeiro@tecnico.ulisboa.pt) (Armando J. L. Pombeiro)

## 1. Catalysis

**Table S1.** MW-assisted oxidation of cyclohexane to cyclohexanol and cyclohexanone catalyzed by formazanate metal complexes **1-3**<sup>a</sup>.

| Entry | Cat.     | Cat.<br>( $\mu\text{mol}$ ) | CyH<br>(mmol) | Yield (%) <sup>b</sup> |      |       | TON <sup>c</sup> |     |
|-------|----------|-----------------------------|---------------|------------------------|------|-------|------------------|-----|
|       |          |                             |               | K                      | A    | Total |                  |     |
| 1     | <b>2</b> | 0.50                        | 1.0           | 3.5                    | 19.5 | 23.0  | 230              |     |
| 2     |          | 0.50                        | 2.5           | 1.4                    | 8.4  | 9.8   | 490              |     |
| 5     |          | 1.00                        | 0.5           | 8.4                    | 7.5  | 15.9  | 79               |     |
| 6     |          | 1.00                        | 1.0           | 2.0                    | 26.6 | 28.6  | 286              |     |
| 7     |          | 1.00                        | 1.5           | 1.7                    | 27.2 | 28.9  | 433              |     |
| 8     |          | 1.00                        | 2.0           | 1.9                    | 22.6 | 24.5  | 490              |     |
| 9     |          | 1.00                        | 2.5           | 2.9                    | 8.3  | 11.2  | 279              |     |
| 10    |          | 1.50                        | 1.0           | 9.6                    | 18.9 | 28.4  | 189              |     |
| 11    |          | 1.50                        | 2.5           | 5.1                    | 10.7 | 15.8  | 263              |     |
| 12    |          | 1.75                        | 1.0           | 6.1                    | 17.9 | 24.0  | 120              |     |
| 13    |          | 1.75                        | 2.5           | 4.9                    | 10.3 | 15.2  | 224              |     |
| 14    |          | 2.00                        | 1.0           | 6.2                    | 14.3 | 20.5  | 117              |     |
| 15    |          | 2.00                        | 2.5           | 4.0                    | 5.8  | 9.8   | 123              |     |
| 16    |          | <b>3</b>                    | 0.50          | 1.0                    | 2.8  | 15.8  | 18.6             | 372 |
| 17    |          |                             | 0.50          | 2.5                    | 2.2  | 5.8   | 8.0              | 400 |
| 18    | 1.00     |                             | 0.5           | 7.9                    | 7.9  | 15.8  | 79               |     |
| 19    | 1.00     |                             | 1.0           | 3.8                    | 16.6 | 20.4  | 204              |     |
| 20    | 1.00     |                             | 1.5           | 1.6                    | 15.1 | 16.7  | 251              |     |
| 21    | 1.00     |                             | 1.75          | 1.3                    | 12.1 | 13.4  | 235              |     |
| 22    | 1.00     |                             | 2.0           | 1.0                    | 11.0 | 12.0  | 240              |     |
| 23    | 1.00     |                             | 2.5           | 0.5                    | 9.2  | 9.7   | 242              |     |
| 24    | 1.50     |                             | 1.0           | 5.0                    | 12.1 | 17.1  | 116              |     |
| 25    | 1.50     |                             | 2.5           | 1.8                    | 9.4  | 11.2  | 164              |     |
| 26    | 2.00     |                             | 1.0           | 1.4                    | 13.2 | 14.6  | 73               |     |
| 27    | 2.00     |                             | 2.5           | 1.8                    | 8.1  | 9.9   | 123              |     |

<sup>a</sup> Reaction conditions unless stated otherwise: 3 mL MeCN, farmazan catalyst (0.5-2.0  $\mu\text{mol}$ ), cyclohexane (1.0-2.5 mmol), oxidant, H<sub>2</sub>O<sub>2</sub> (5 mmol), 80 °C, 20 W, 1 h. <sup>b</sup> Moles of product/100 moles of cyclohexane (A = cyclohexanol and K = cyclohexanone). <sup>c</sup> Overall TON (moles of products/mole of catalyst). GC analysis performed upon addition of PPh<sub>3</sub> (conversion of CyOOH into cyclohexanol prior to GC analysis).

## 2. X-ray analysis

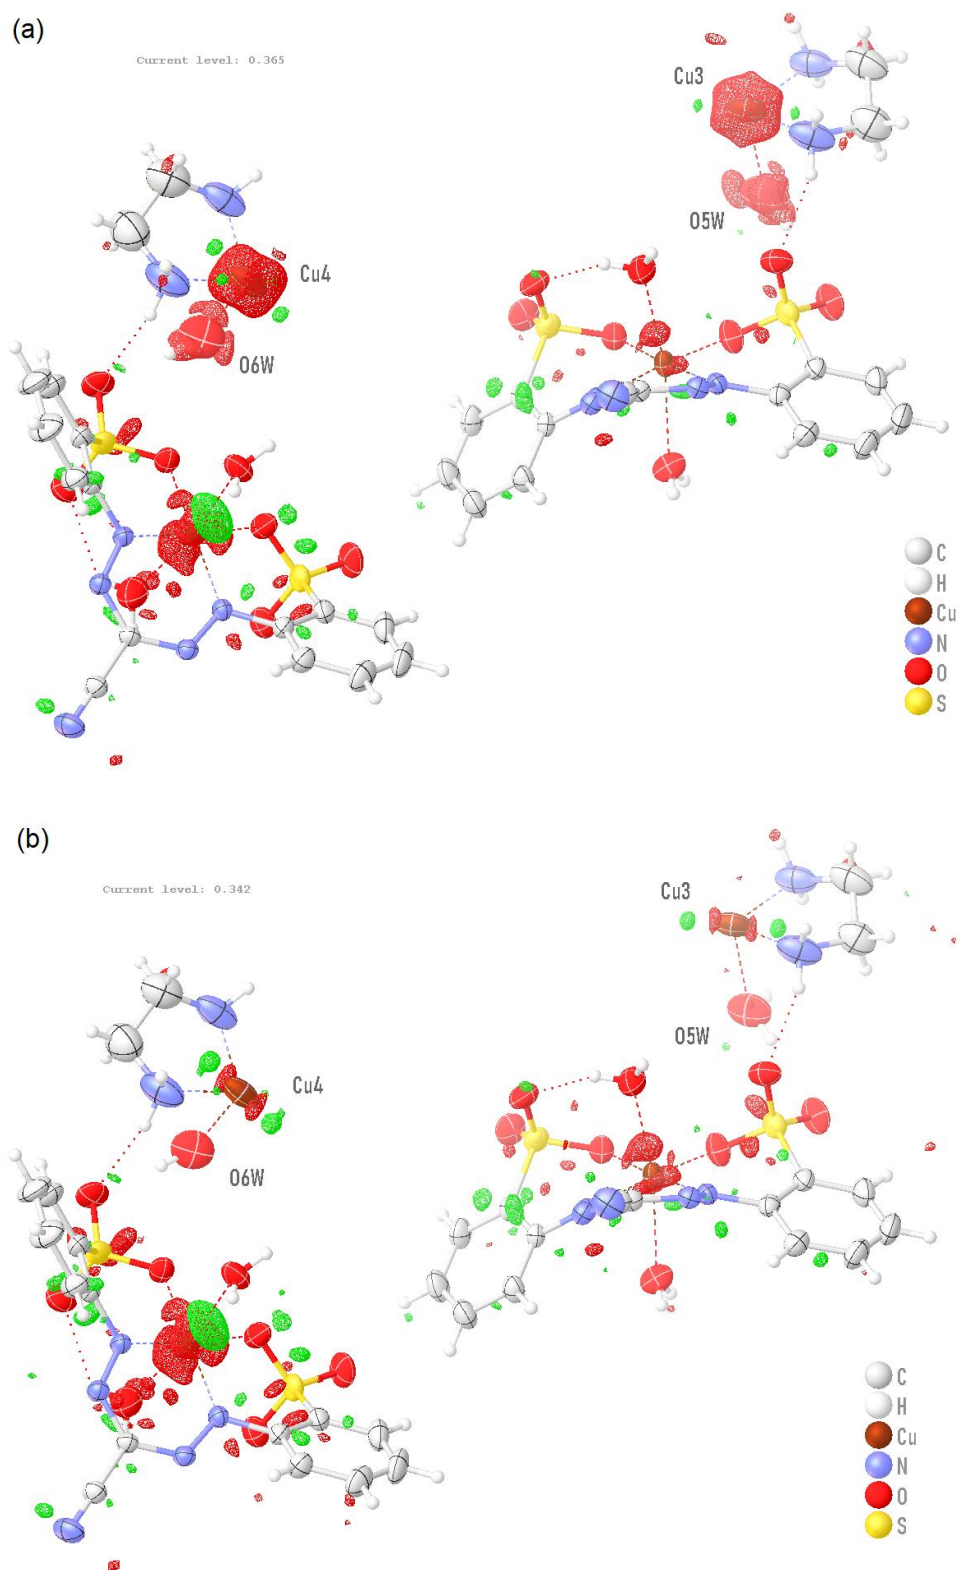

**Figure S1.** Residual density maps before (a) and after (b) freely refinement of occupancies of Cu3, Cu4 and of the attached water molecules O5w, O6w.
